# Supplementary material for: Prospective Evaluation of Whole Genome MicroRNA Expression Profiling in Childhood Acute Lymphoblastic Leukemia
Source: Hindawi journal article supplement (doi:10.1155/2014/967585), 2014-01-01
Supplement: f1 [file 967585.f1.pdf]

**Supplemental Table 1.** Significant miRNA profile compared to control cases by microarray study in T-lineage ALL and B-lineage ALL. No significant miRNA was detected after FDR correction in died ALL patients (upregulated miRNAs are shown in bold)

| T-lineage ALL          |             | B-lineage ALL         |             | Dead (B-lineage)    |             |
|------------------------|-------------|-----------------------|-------------|---------------------|-------------|
| miRNA                  | Fold Change | miRNA                 | Fold Change | miRNA               | Fold Change |
| <b>hsa-miR-548i</b>    | 20,00       | <b>hsa-miR-708</b>    | 12,50       | <b>hsa-miR-548i</b> | 25.0        |
| <b>hsa-miR-3140</b>    | 14,29       | <b>hsa-miR-181b</b>   | 5,26        | hsa-miR-3191        | -2.43       |
| <b>hsa-miR-181b</b>    | 11,11       | <b>hsa-miR-369-3p</b> | 4,00        | hsa-miR-4296        | -2.78       |
| <b>hsa-miR-3115</b>    | 11,11       | <b>hsa-miR-146a</b>   | 3,57        | hsa-miR-513a-5p     | -3.2        |
| <b>hsa-miR-548d-5p</b> | 8,33        | <b>hsa-miR-155</b>    | 2,94        |                     |             |
| <b>hsa-miR-449a</b>    | 6,25        | <b>hsa-miR-195</b>    | 2,70        |                     |             |
| <b>hsa-miR-181c</b>    | 6,25        | <b>hsa-miR-128</b>    | 2,44        |                     |             |
| <b>hsa-miR-181a</b>    | 5,56        | hsa-miR-143           | -2,24       |                     |             |
| <b>hsa-miR-181a*</b>   | 5,56        | hsa-miR-145           | -2,50       |                     |             |
| <b>hsa-let-7b*</b>     | 5,00        |                       |             |                     |             |
| <b>hsa-miR-1827</b>    | 4,55        |                       |             |                     |             |
| <b>hsa-miR-92a-1*</b>  | 3,85        |                       |             |                     |             |
| <b>hsa-miR-299-3p</b>  | 3,85        |                       |             |                     |             |
| <b>hsa-miR-155</b>     | 3,33        |                       |             |                     |             |
| <b>hsa-miR-181a-2*</b> | 3,23        |                       |             |                     |             |
| <b>hsa-miR-1323</b>    | 2,94        |                       |             |                     |             |
| <b>hsa-miR-587</b>     | 2,70        |                       |             |                     |             |
| <b>hsa-miR-7-1*</b>    | 2,63        |                       |             |                     |             |
| <b>hsa-miR-28-3p</b>   | 2,38        |                       |             |                     |             |
| <b>hsa-miR-130b</b>    | 2,33        |                       |             |                     |             |
| <b>hsa-miR-27b</b>     | 2,22        |                       |             |                     |             |
| <b>hsa-miR-361-5p</b>  | 2,08        |                       |             |                     |             |
| hsa-miR-633            | -2,04       |                       |             |                     |             |
| hsa-miR-326            | -2,08       |                       |             |                     |             |
| hsa-miR-501-3p         | -2,11       |                       |             |                     |             |
| hsa-miR-802            | -2,15       |                       |             |                     |             |
| hsa-miR-4260           | -2,17       |                       |             |                     |             |
| hsa-miR-3130-5p        | -2,26       |                       |             |                     |             |
| hsa-miR-145            | -2,59       |                       |             |                     |             |
| hsa-miR-186            | -2,68       |                       |             |                     |             |
| hsa-miR-593*           | -2,76       |                       |             |                     |             |
| hsa-miR-574-3p         | -2,79       |                       |             |                     |             |
| hsa-miR-4262           | -2,81       |                       |             |                     |             |
| hsa-miR-640            | -3,03       |                       |             |                     |             |
| hsa-miR-606            | -3,62       |                       |             |                     |             |

**ALL:** Acute lymphoblastic leukemia
